# Supplementary material for: Enhancing students’ written production in English through flipped lessons and simulations
Source: Springer Nature journal article supplement (doi:10.1186/s41239-019-0131-8), 2019-02-05
Supplement: MOESM2 [file 16445040]

**Additional file 2**

**ESSAY WRITING ASSESSMENT CRITERIA** adapted from:University of Cambridge. ESOL Examinations (2012) <http://www.cambridgeenglish.org/images/23166-research-notes-49.pdf>
