# Supplementary material for: Enhancing students’ written production in English through flipped lessons and simulations
Source: Springer Nature journal article supplement (doi:10.1186/s41239-019-0131-8), 2019-02-05
Supplement: MOESM3 [file 16445040]

### Additional file 3

### Letter of consent

Dear …………:

You are being invited to participate in a research study on students’ experience on ESL classes. In particular, we are interested in production skills (speaking and writing) and transversal skills (team work). During this time, Some of you will be giving oral presentations, having a specific role in your team and writing about a specific topic in English. Some of you will be tape-recorded and examined by three external examiners. Your written production will also be examined by the external examiners.

There are no anticipated risks or discomforts related to this research. At no time will your name be used or any identifying information revealed. If you wish to receive a copy of the results from this study, you may contact one of the researchers at their office or at …

I have read (or have been read) the above information regarding this research study on the experience of simulation in ESL, and consent to participate in this study. __________________________________________ (Printed Name) __________________________________________ (Signature) __________________________________________ (Date)
